# Supplementary material
Source: PubMed Central journal article supplement (PMC3057431)

Online Resource 1

Snow, et al.

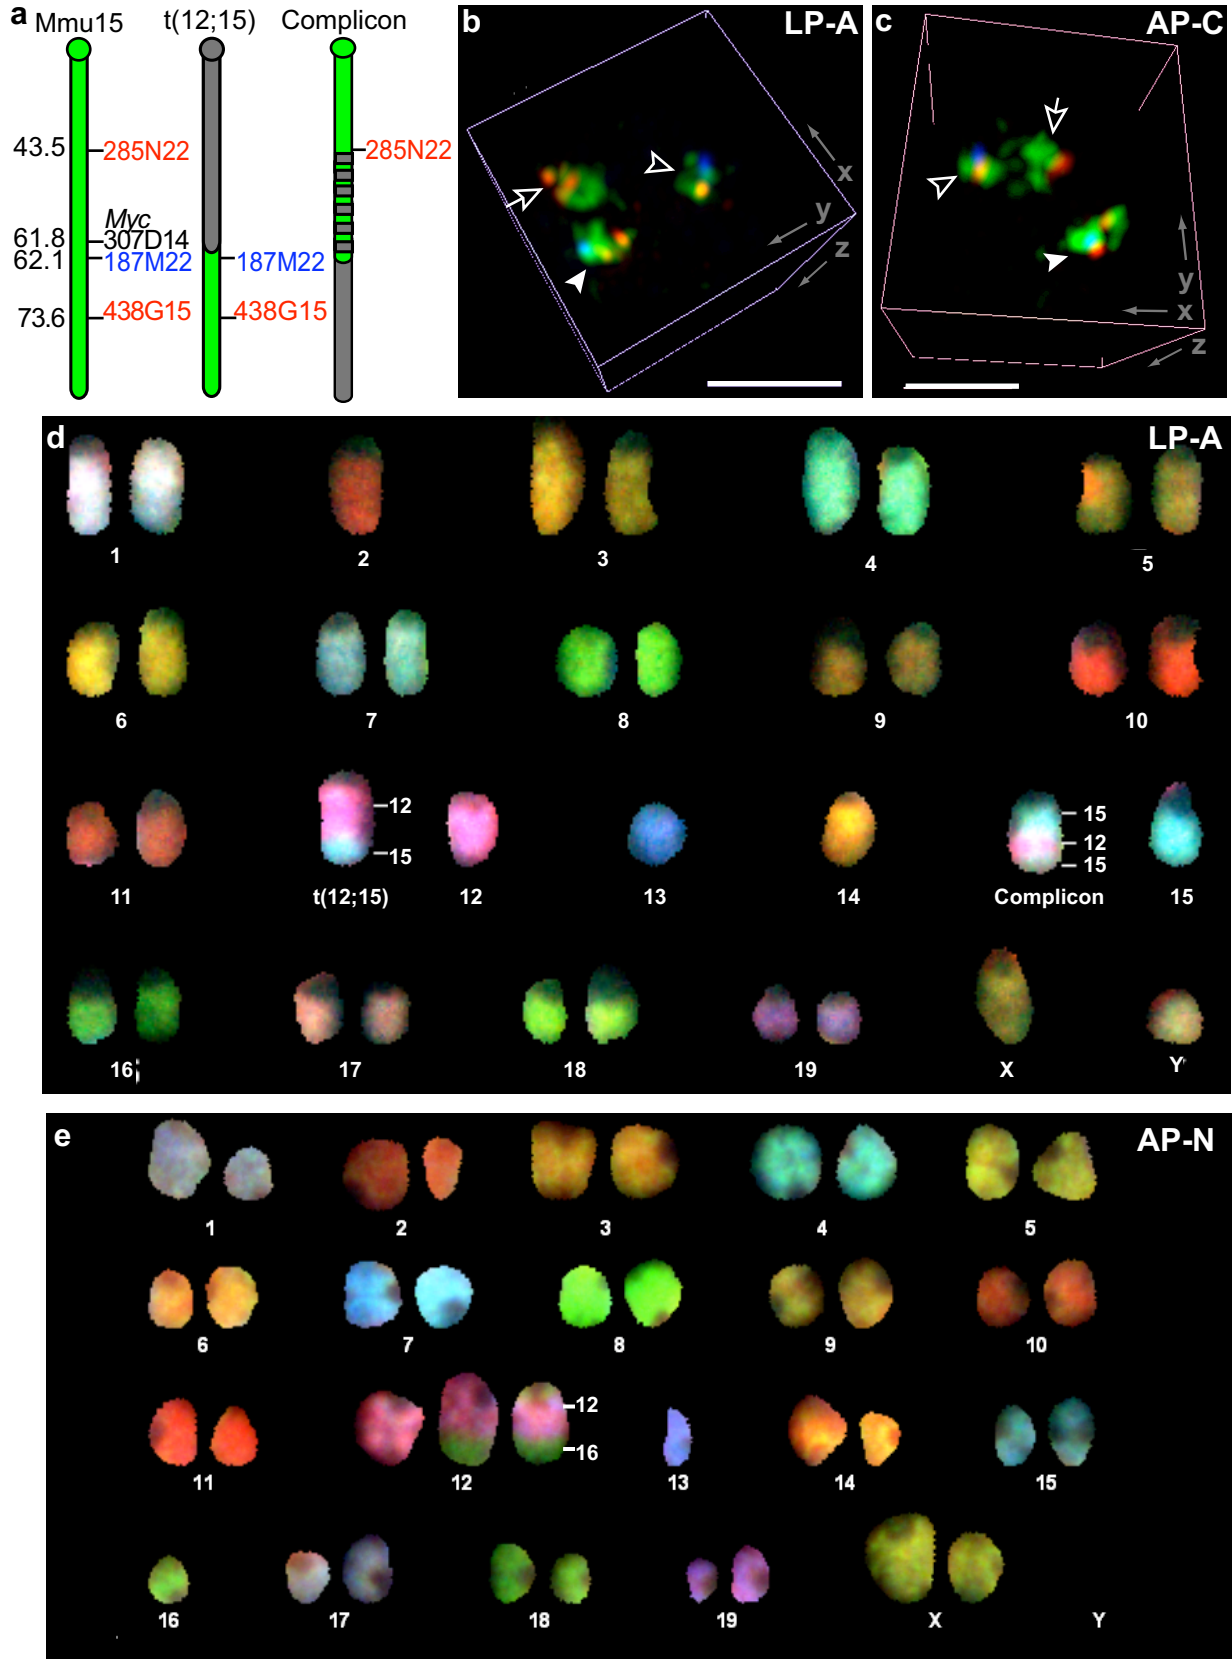

Supplement: NIHMS273432-supplement-Online_Resource_1.pdf [file NIHMS273432-supplement-Online_Resource_1.pdf]

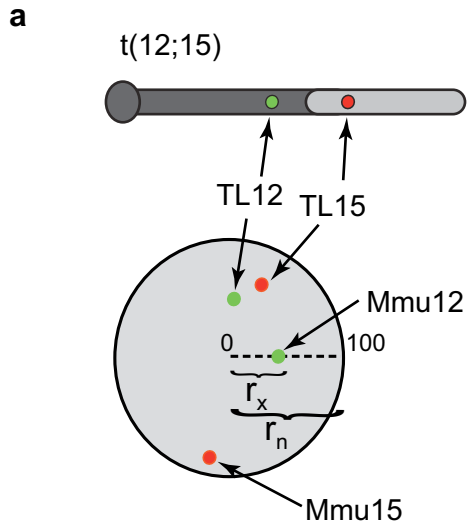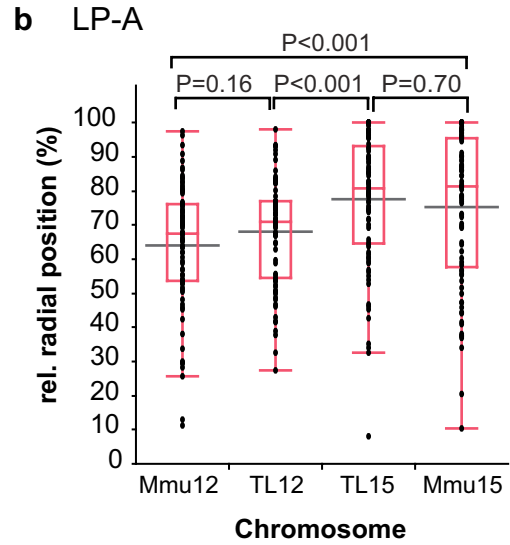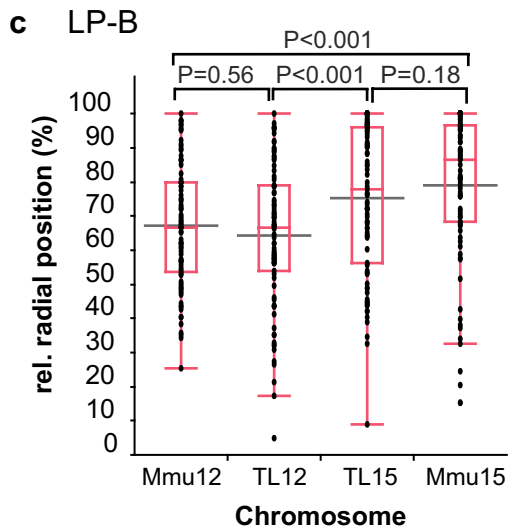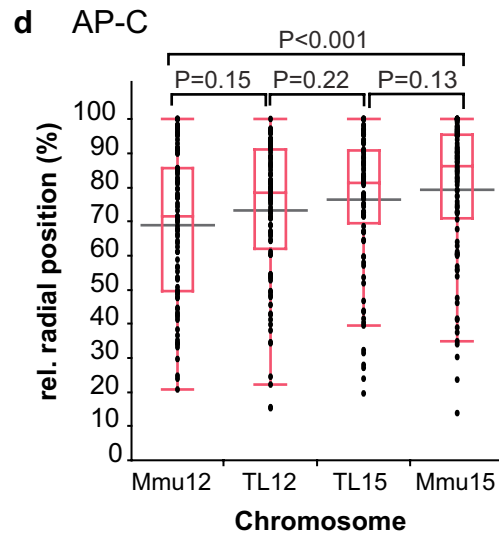

Supplement: NIHMS273432-supplement-Online_Resource_2.pdf [file NIHMS273432-supplement-Online_Resource_2.pdf]

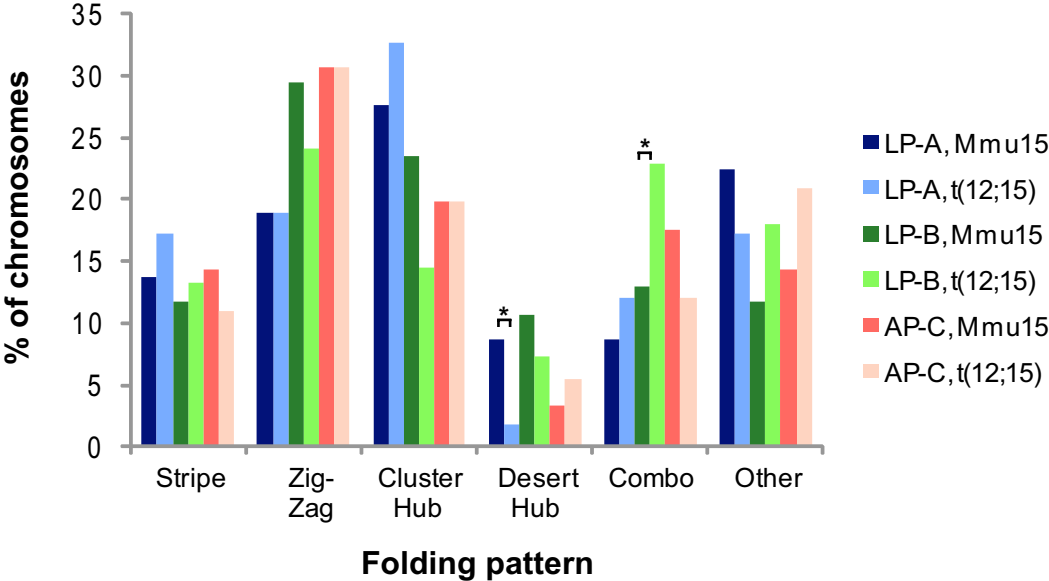

Supplement: NIHMS273432-supplement-Online_Resource_4.pdf [file NIHMS273432-supplement-Online_Resource_4.pdf]

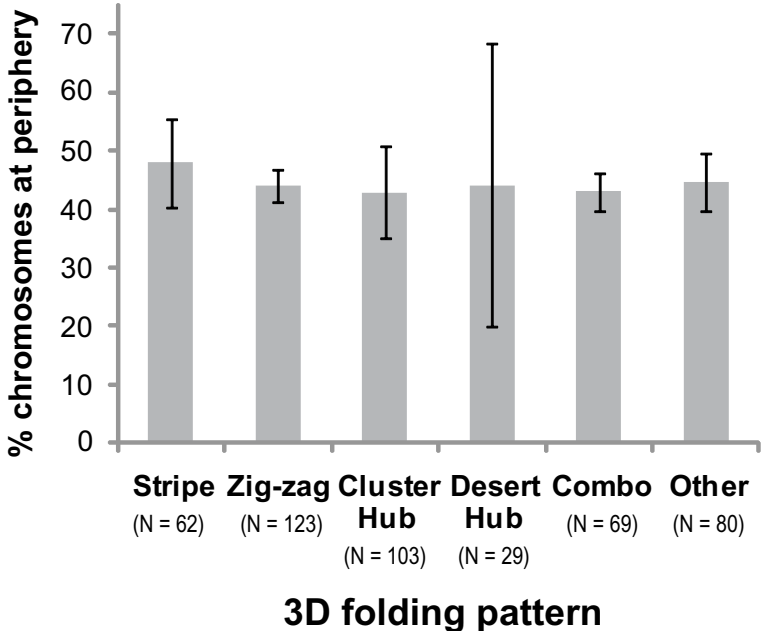

Supplement: NIHMS273432-supplement-Online_Resource_5.pdf [file NIHMS273432-supplement-Online_Resource_5.pdf]
